# Supplementary material for: Iron(iii) oxyhydroxide and oxide monoliths with controlled multiscale porosity: synthesis and their adsorption performance
Source: Royal Society of Chemistry journal article supplement (doi:10.1039/c8ta01691g), 2018-01-01
Supplement: c8ta01691g1.pdf [file c8ta01691g1.pdf]

Supplementary Information for

**Iron(III) oxyhydroxide and oxide monoliths with controlled multiscale porosity: synthesis and their adsorption performance**

Yosuke Hara,<sup>a</sup> Kazuyoshi Kanamori,<sup>a</sup> Kei Morisato,<sup>a,b</sup> Riichi Miyamoto,<sup>a,c</sup> and Kazuki Nakanishi<sup>a\*</sup>

<sup>a</sup> Department of Chemistry, Graduate School of Science, Kyoto University, Kitashirakawa, Sakyo-ku, Kyoto 606-8502, Japan.

<sup>b</sup> GL Sciences, Inc. 237-2 Sayamagahara, Iruma, Saitama, 358-0032, Japan.

<sup>c</sup> SnG Inc., 1-39 Goryo-Ohara, Nishikyo-ku, Kyoto 615-8245, Japan.

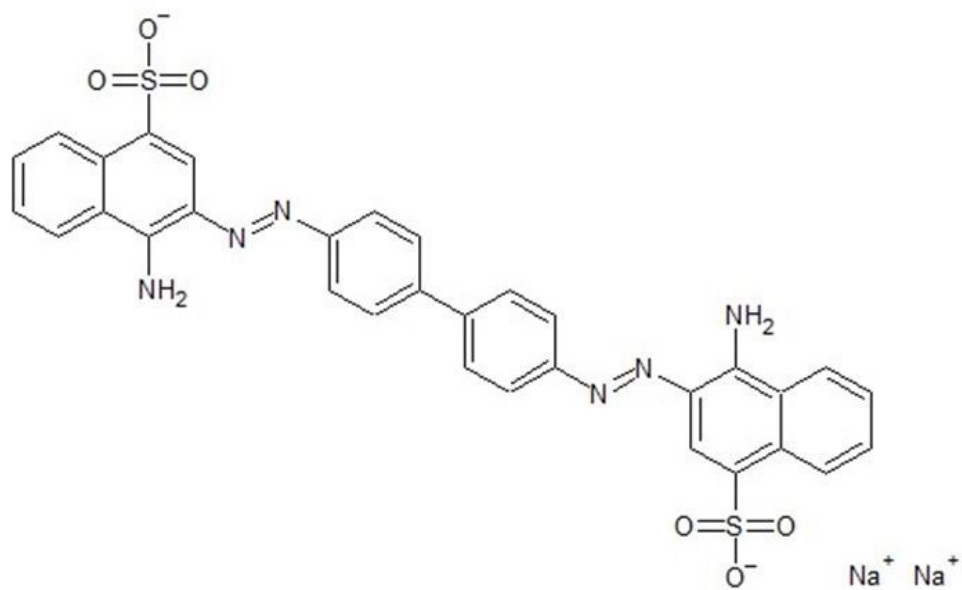

Fi

Figure S1. The molecular structure of Congo red.

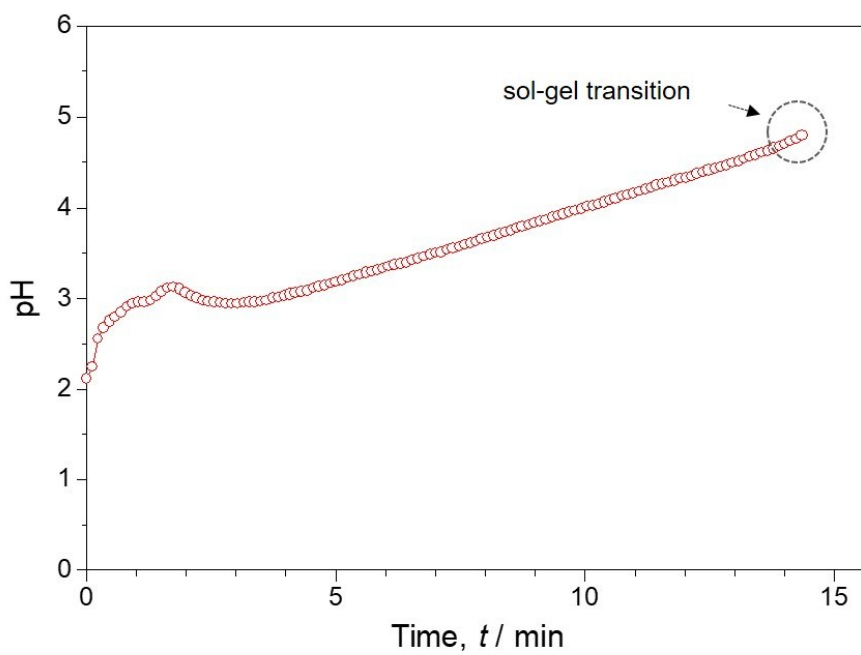

Figure S2. Time evolution of pH in the reaction solution:  $w_{\text{PEO}} = 0$  mg.

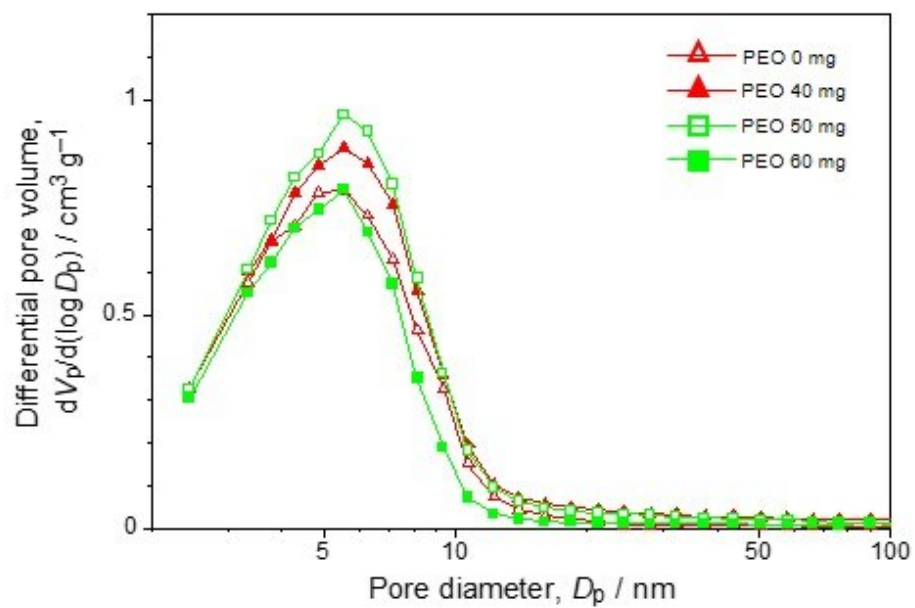

**Figure S3.** BJH mesopore size distributions obtained from the  $\text{N}_2$  adsorption branch of as-dried iron(III) oxyhydroxide monoliths prepared with varied amounts of PEO.

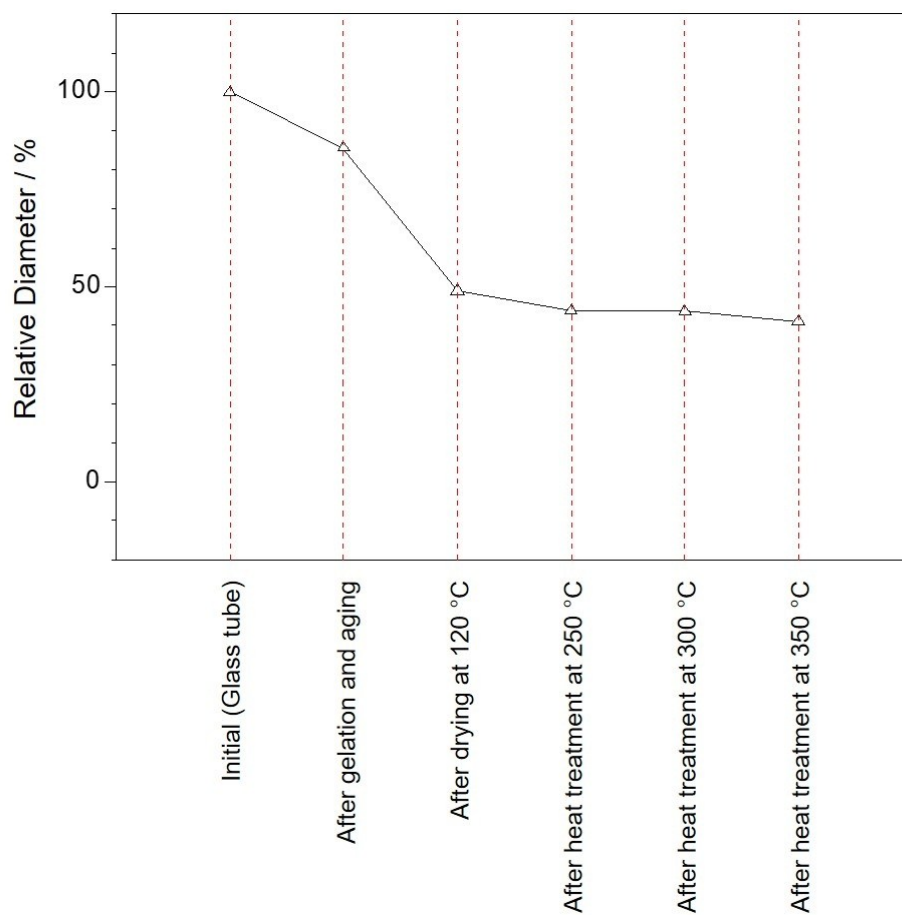

**Figure S4.** Change in diameter of the iron(III) oxyhydroxide and oxide monoliths during gelation, drying, and heat treatment processes.

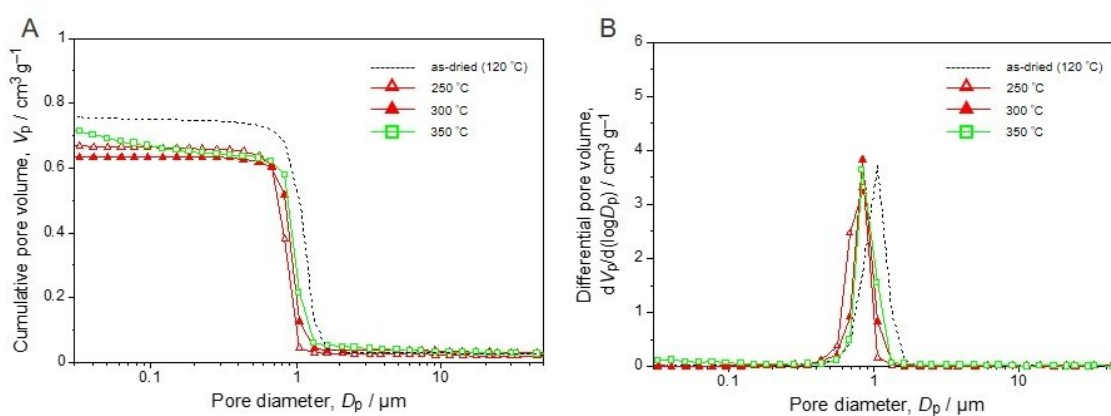

**Figure S5.** (A, B) Pore size distributions of iron(III) oxyhydroxide or oxide monoliths heat treated at different temperatures.

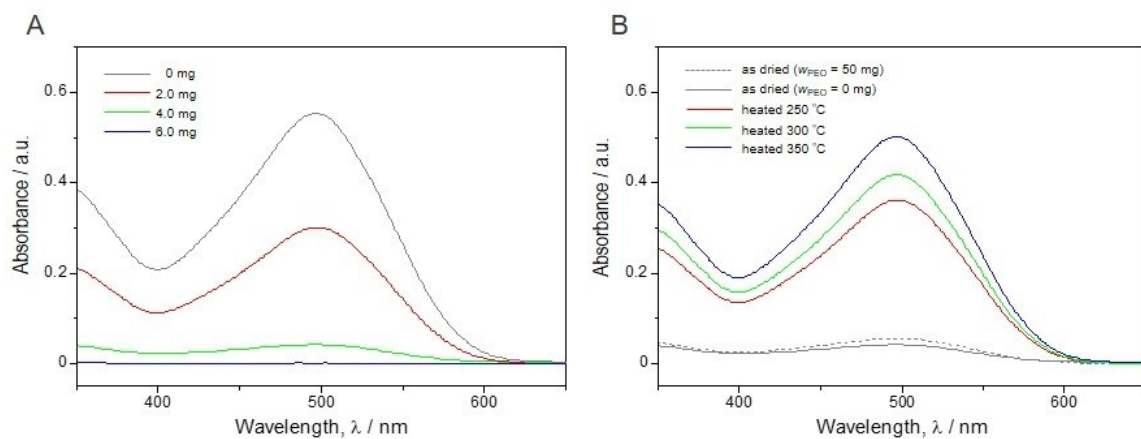

**Figure S6.** (A, B) UV-Vis adsorption spectra of Congo red solutions treated by different amounts and kinds of samples.

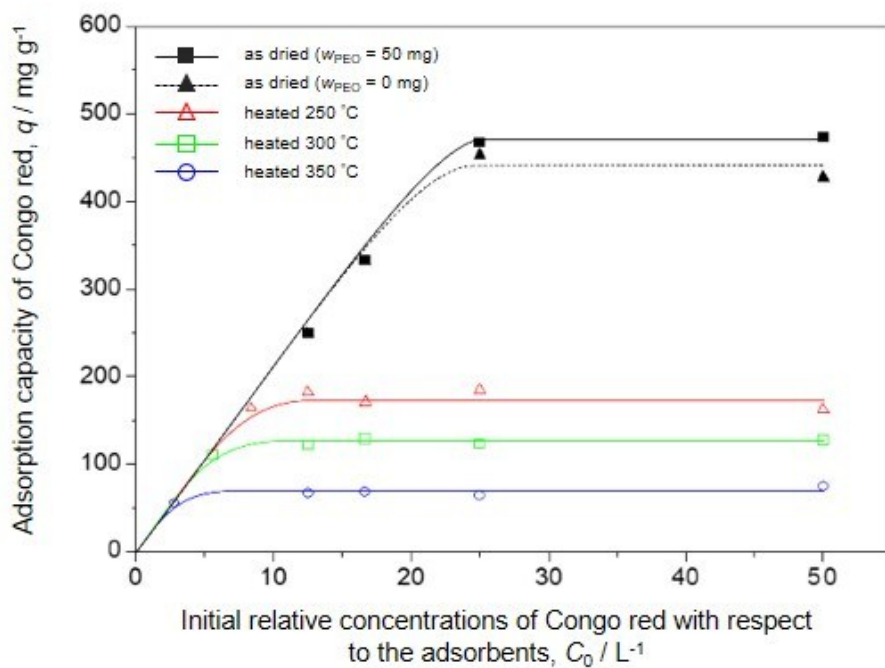

**Figure S7.** Adsorption isotherms for Congo red on the different kinds of samples.

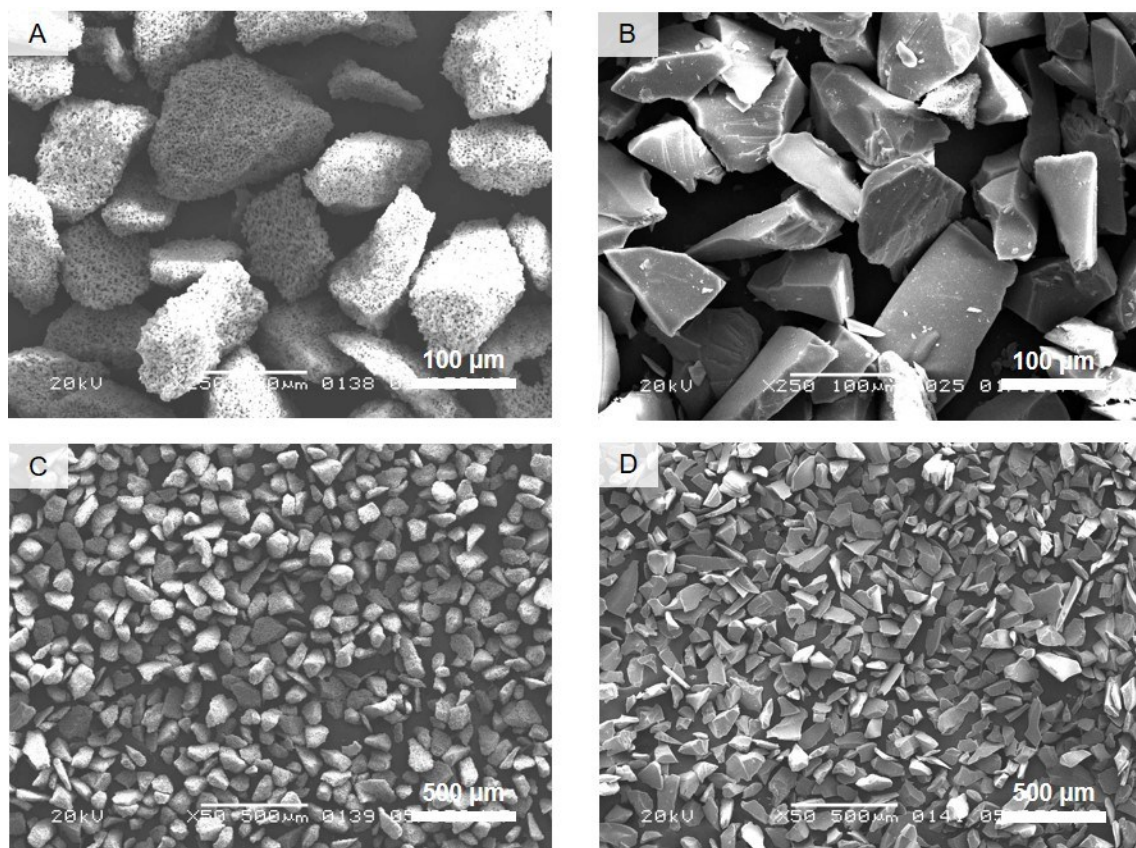

**Figure S8.** (A, C) SEM images of the crushed macroporous monoliths:  $w_{\text{PEO}} = 50$  mg. (B, D) SEM images of the crushed non macroporous monoliths:  $w_{\text{PEO}} = 0$  mg.

**Table S1.** Zeta potential and corresponding pH of the different samples.

| Sample                                                            | Zeta potential, $V / \text{mV}$ | pH  |
|-------------------------------------------------------------------|---------------------------------|-----|
| as-dried (50): amorphous $\text{FeOOH}$                           | 26                              | 4.0 |
| as-dried (0): amorphous $\text{FeOOH}$                            | 27                              | 4.4 |
| sample heated 250 °C : -                                          | -3.0                            | 5.0 |
| sample heated 300 °C: crystalline $\alpha\text{-Fe}_2\text{O}_3$  | -6.8                            | 5.5 |
| sample heated 350 °C : crystalline $\alpha\text{-Fe}_2\text{O}_3$ | -18                             | 5.5 |
